1 **Effectiveness of Ferritin-guided Donation Intervals in Blood Donors: Results of the Stepped-wedge**

2 **Cluster Randomized FIND'EM Trial**

3 Amber Meulenbeld<sup>1,2</sup>, [a.meulenbeld@sanquin.nl](mailto:a.meulenbeld@sanquin.nl)

4 Steven Ramondt<sup>1,3</sup>, [s.ramondt@vu.nl](mailto:s.ramondt@vu.nl)

5 Maike G. Sweegers<sup>1</sup>, [m.sweegers@nki.nl](mailto:m.sweegers@nki.nl)

6 Franke A. Quee<sup>1,2</sup>, [f.quee@sanquin.nl](mailto:f.quee@sanquin.nl)

7 Femmeke J. Prinsze<sup>1</sup>, [f.prinsze@sanquin.nl](mailto:f.prinsze@sanquin.nl)

8 Emiel O. Hoogendijk<sup>4,5</sup>, [e.hoogendijk@amsterdamumc.nl](mailto:e.hoogendijk@amsterdamumc.nl)

9 Dorine W. Swinkels<sup>6,7</sup>, [dorine.swinkels@radboudumc.nl](mailto:dorine.swinkels@radboudumc.nl)

10 Katja van den Hurk<sup>1,2</sup>, [k.vandenhurk@sanquin.nl](mailto:k.vandenhurk@sanquin.nl)

11 1. Donor Studies, Donor Medicine Research, Sanquin Research, Amsterdam, the Netherlands;

12 2. Department of Public and Occupational Health, Amsterdam Public Health research institute,  
13 Amsterdam UMC, Amsterdam, the Netherlands;

14 3. Department of Communication Science, Vrije Universiteit Amsterdam, Amsterdam, the  
15 Netherlands;

16 4. Department of Epidemiology and Data Science, Amsterdam Public Health research institute,  
17 Amsterdam UMC, Amsterdam, the Netherlands;

18 5. Department of General Practice, Amsterdam Public Health research institute, Amsterdam  
19 UMC – Location VU University medical center, Amsterdam, the Netherlands;

20 6. Department of Laboratory Medicine, Radboud University Nijmegen, Nijmegen, Gelderland,  
21 The Netherlands;

22 7. Center for Iron Disorders Sanquin, Sanquin Blood Supply Foundation, Amsterdam, Noord-  
23 Holland, The Netherlands.

24

25 **Running head:** FIND'EM: A stepped-wedge trial of ferritin monitoring in blood donors

26 **Words** (max. 3000): 2,997

27

28 **Corresponding author**

29 Amber Meulenbeld

30 Sanquin Research

31 Plesmanlaan 125

32 PO box 9137

33 1006 AC Amsterdam, the Netherlands

34 E-mail: a.meulenbeld@sanquin.nl

35 **Key Points**

36 **Question**

37 Are ferritin-guided donation intervals effective in diminishing iron deficiency and low hemoglobin in  
38 whole blood donors?

39

40 **Findings**

41 In this stepped-wedge cluster randomized trial with 412,888 donors and 1,643,700 donations,  
42 ferritin-guided donation intervals were associated with a significant improvement in hemoglobin and  
43 ferritin levels and decreased donor return rates. Data did not suggest improved self-reported health  
44 outcomes.

45

46 **Meaning**

47 Ferritin-guided donation intervals, in addition to hemoglobin monitoring, as part of the donor iron  
48 management strategy of blood establishments effectively reduce the prevalence of iron deficiency  
49 and anemia in whole blood donors, but additional efforts to retain donors are required.

50 **Abstract**

51 **Importance** Blood donors are at increased risk for iron deficiency. Current hemoglobin (Hb)  
52 monitoring policies are inadequate and iron management strategies are warranted.

53 **Objective** To determine the effects of ferritin-guided donation intervals for whole blood donors on  
54 Hb and ferritin levels, Hb deferral, iron deficiency (ferritin < 15 ng/mL) prevalence, donor return, iron  
55 deficiency-related symptoms, and the blood supply.

56 **Design, setting and participants** Between November 2017 and November 2019 a ferritin-guided  
57 donation interval policy was implemented and evaluated through a stepped-wedge cluster-  
58 randomized controlled trial in all blood collection centers in the Netherlands. During the study  
59 period, 412,888 donors visited the blood bank.

60 **Interventions** Ferritin was measured in new donors and at every 5<sup>th</sup> whole blood donation.  
61 Subsequent donation intervals were extended to six months if ferritin is  $15 \leq 30$  ng/mL and to twelve  
62 months if ferritin is <15 ng/mL.

63 **Main outcomes and Measures** Primary outcomes are ferritin and Hb levels, iron deficiency, Hb  
64 deferral, and donor return. Secondary outcomes are self-reported iron deficiency-related symptoms.  
65 Yearly donor and donation statistics were used to assess the impact on the blood supply.

66 **Results** We measured 36,099 donors, median age 43 years and 52% female, making 37,621  
67 donations during the study period. Ferritin-guided donation intervals were associated with increased  
68 log-transformed ferritin levels at all time points in the trial, up to 0.24 log<sub>10</sub> ng/mL as compared to  
69 baseline (95% CI 0.22 – 0.27, p <0.001). Hb increased as well, up to 0.37 g/dL (95% CI 0.31 – 0.43, p  
70 <0.001). Decreased odds of 85% (95% CI OR 0.10 – 0.21, p <0.001) for iron deficiency and 77% (95%  
71 CI OR 0.11 – 0.41, p <0.001) for Hb deferral were reported compared to baseline. Odds of donor  
72 return decreased over the course of the trial, with as much as 40% (95% CI OR 0.51 – 0.67, p <0.001).  
73 We found no evidence for improved self-reported iron deficiency-related symptoms after  
74 implementation of the new policy. More invitations had to be sent to donors to obtain one donation  
75 and the average donation frequency per year decreased.

76 **Conclusion and Relevance** Ferritin-guided donation intervals were significantly associated with  
77 increasing overall Hb and ferritin levels, thereby decreasing the prevalence of iron deficiency and Hb  
78 deferrals in whole blood donors. Ferritin-guided donation intervals seem beneficial for Hb levels and  
79 iron maintenance, but additional efforts are required to retain donors and to remedy self-reported  
80 iron deficiency-related symptoms.

81 **Trial Registration** This trial has been registered in the Dutch trial registry (NTR6738) on September  
82 29<sup>th</sup>, 2017 (<https://trialsearch.who.int/Trial2.aspx?TrialID=NTR6738>).

83

84 Key words: blood donation, donation interval, donor health, stepped-wedge cluster randomized trial,  
85 ferritin

86 **Introduction**

87 Annually, more than 100 million whole blood donations are made worldwide to provide life-saving  
88 treatment for patients requiring transfusion.<sup>1</sup> Whole blood donors that donate repeatedly are at risk  
89 of developing iron deficiency and subsequent anemia.<sup>2</sup> Male donors lose approximately 8% of their  
90 total iron stores with each whole blood donation, whereas menstruating women lose on average  
91 81% of their total iron stores.<sup>3-5</sup> Iron stores can be monitored through measuring ferritin. Iron  
92 deficiency, ferritin levels <15 ng/ml, presents in approximately 15.0% of female and 9.4% of male  
93 Dutch repeat donors.<sup>6</sup>

94

95 There is no consensus on iron management strategies for donor health, but key approaches include  
96 extended donation intervals and iron supplementation.<sup>7-9</sup> Concerns about negative perceptions, side  
97 effects, and low compliance may favor extended donation intervals.<sup>9,10</sup> In previous studies, extended  
98 donation intervals were associated with lower risk of Hb deferrals.<sup>11,12</sup> The INTERVAL trial showed  
99 that longer donation intervals led to significantly higher Hb and ferritin levels.<sup>12</sup> Most blood  
100 establishments monitor Hb to protect donor health, prevent anemia and ensure sufficient Hb content  
101 in the product, deferring blood donors with Hb levels below 13.5 g/dL (males) or 12.5 g/dL  
102 (females).<sup>7-9,13-15</sup> However, iron deficiency can present without anemia, especially in repeat donors.  
103 As Hb levels do not reflect iron stores, the current standard is insufficient to maintain proper iron  
104 reserves. The World Health Organization (WHO) advises additional monitoring of ferritin to detect  
105 iron deficiency and monitor donor health.<sup>16</sup>

106

107 In 2017, Sanquin Blood Bank in The Netherlands implemented a nationwide policy for iron  
108 monitoring of whole blood donors. In addition to the Hb measurement at the pre-donation  
109 screening, ferritin is measured at the first visit of new donors and after every fifth whole blood  
110 donation of repeat donors. If ferritin is between 15 and 30 or below 15 ng/mL, the subsequent  
111 donation interval is extended to six or twelve months, respectively. A stepped-wedge approach was

112 used to evaluate the effects of this ferritin-guided donation interval policy for whole blood donors on  
113 (1) Hb and ferritin levels, (2) iron deficiency, (3) Hb deferral, (4) donor return rates, (5) self-reported  
114 iron deficiency-related symptoms, and (6) the blood supply.

115

## 116 **Methods**

### 117 *Design*

118 Ferritin measurement IN Donors—Effectiveness of iron Monitoring (FIND’EM) is a stepped-wedge  
119 cluster randomized trial, described in detail by Sweegers et al.<sup>17</sup> We conducted cross-sectional ferritin  
120 measurements before, during, and after implementing a new policy for all donors visiting a blood  
121 collection center during pre-selected weeks. We measured ferritin in stored plasma samples from  
122 donors who consented to use their leftover donations for medical research. Additionally, optional  
123 questionnaires were offered to donors. The trial was powered on 4ng/mL change in the ferritin level  
124 outcome over six months, assuming a SD of 54 ng/mL, ICC of 0.10 and 150 visits per donation  
125 center.<sup>17</sup> The policy and implementation strategy was approved by Sanquin’s Medical and Ethical  
126 Advisory Board. The trial was approved by Sanquin’s Board of Directors.

127

### 128 *Randomization*

129 The 138 fixed and mobile blood collection centers in the Netherlands are divided over 29 staffing  
130 clusters that we randomly assigned to four randomization groups. The stepped-wedge design  
131 involved random and sequential rollout of ferritin-guided donation intervals in all 29 clusters by  
132 randomization group from November 2017 to November 2019. The allocation was not concealed and  
133 the planned timing of the rollout was revealed before the study. Donors were notified of the new  
134 policy through letters upon implementation at their regular donation center.

135

136 *Procedures*

137 As part of routine procedures, donors undergo a health screening to assess their eligibility to donate  
138 by measuring Hb levels and blood pressure and assessing recent travel, sexual and medical history  
139 prior to every donation. In the Netherlands, donors also make a pre-donation screening visit prior to  
140 their first donation. In accordance with European legislation, Hb cut-offs for donor eligibility are  
141 >13.5 g/dL for males and >12.5 g/dL for females.<sup>18</sup> Donors with low Hb (capillary measurement prior  
142 to donation with HemoCue 201, Angelholm, Sweden) are deferred for 3 months. If eligible, males can  
143 donate every 56 days up to five times a year, females every 122 days up to three times a year,  
144 independent of menopausal status.

145

146 The intervention entails extended donation intervals based on ferritin measurements. The cut-offs  
147 for extended intervals were based on definitions for iron deficiency (<15 ng/mL, 12 months deferral)  
148 and reduced iron levels ( $\leq$ 30 ng/mL, 6 months deferral) by Alvarez-Ossorio et al.<sup>9</sup> The six month  
149 interval is based on the results from Schotten et al., suggesting intervals of at least 180 days are  
150 required to fully replete iron stores after donation.<sup>8</sup> A twelve month interval is indicated for iron  
151 deficient donors to replete to higher levels than pre-donation. In whole blood donors, ferritin is  
152 measured at the pre-donation screening visit before the first donation and of each fifth whole blood  
153 donation. If ferritin levels are >30 ng/mL, donors are eligible to donate at regular donation intervals.  
154 If ferritin levels are  $\leq$ 30 ng/mL but  $\geq$ 15 ng/mL, repeat donors are deferred for six months; new  
155 donors are allowed to donate, but ferritin is measured again at this first donation, after which they  
156 follow the repeat donor policy. If ferritin levels are <15 ng/mL, new and repeat donors are deferred  
157 from donating for twelve months. Ferritin levels are measured again in the donation after this  
158 extended interval. Donor physicians may additionally advise donors to visit their general practitioner  
159 and/or donate at a lower frequency.<sup>17</sup>

160



161 *Outcome assessment*

162 Before the trial, we established four measurement points: 1) one week before implementation  
163 (baseline), 2) midway through implementation, 3) one week after full implementation, and 4) one  
164 year after full implementation of ferritin-guided donation intervals. Primary outcomes included Hb  
165 and ferritin levels, Hb deferral, iron deficiency, and donor return rates, while secondary outcomes  
166 encompassed iron deficiency-related symptoms and the impact on the blood supply. Pseudonymized  
167 data on age, sex, Hb levels, and deferrals were extracted from the blood bank database (eProgesa  
168 software application; MAK-SYSTEM, Paris, France) for donors who visited a blood collection center  
169 during a measurement week and consented to their information and leftover materials being used  
170 for research. Donor return was defined as attempting a donation within six months after becoming  
171 eligible to donate again, accounting for minimum donation intervals and possible deferrals. We  
172 measured ferritin levels on the Architect i2000sr (Abbott Diagnostics) in plasma samples collected at  
173 donation in K3EDTA tubes (VACUETTE®, Greiner Bio-One, Kremsmünster, Austria) and stored at -30°C  
174 for three to 24 months.<sup>19</sup>

175

176 New and repeat donors in fixed blood collection centers during measurement week 2 and 3 that  
177 provided informed consent were asked to complete questionnaires. These questionnaires assess  
178 physical and mental wellbeing (SF-36), fatigue (Checklist Individual Strength), donation-related  
179 symptoms, restless legs syndrome (RLS) and pica, cognitive functioning (Cognitive Failure  
180 Questionnaire), and warm glow.<sup>12,17,20-23</sup> Questionnaires were completed using Qualtrics XM®  
181 software (Provo, UT, USA) during or shortly after the donation.<sup>17</sup>

182

183 We aimed to assess the impact of the new policy on the blood supply by comparing operational data  
184 from the blood bank during and one year before and after the study period. We gathered data on  
185 whole blood donations, donors and donations invitations from the blood bank database (eProgesa  
186 software application; MAK-SYSTEM, Paris, France). Available donors were defined as not being

187 deferred for medical (iron-related or other), travel or lifestyle factors; new donors as showing up for  
188 the pre-donation screening; and lapsed donors when they deregistered or did not respond to 5  
189 subsequent invitations. Demands for each year were based on hospital requests and converted to  
190 blood units.

191

## 192 *Data analyses*

193 Descriptive statistics are provided for the donors measured during measurement week 1. Using  
194 donors measured during all four weeks, we conducted complete case analysis and used ordinary  
195 least squares regression in case of continuous outcomes and logistic regression for binary outcomes.  
196 After diagnostic tests of linearity and errors assumptions, a log base 10 transformation was applied to  
197 improve linearity of ferritin. We conducted robust regression to analyze cognitive functioning,  
198 physical health, mental health and fatigue, as the normality assumption for logistic regression was  
199 violated. Measurements after implementation were grouped in periods of 6 months and compared  
200 to the control condition. The control condition was defined as no implementation of the new policy  
201 or implementation less than 6 months ago. Analyses were adjusted for age, weight and height, and  
202 stratified by sex and menopausal status. Donor return analyses were adjusted for return being during  
203 a COVID-19 lockdown. Null hypotheses are that there are no associations between implementation  
204 of the new policy and the outcomes. A two-sided p-value of  $<0.05$  is considered statistically  
205 significant and a Bonferroni correction is applied. Statistical analyses were conducted using the R  
206 language and environment for statistical computing (4.1.1) and the lme4 (1.1.33), car (3.1.2), lmtest  
207 (0.9.40), sandwich (3.0.2), olsrr (0.5.3), and robustbase (0.95.1) packages.<sup>24–30</sup> HTML files of the  
208 scripts and results produced in Quarto are available on GitHub through  
209 <https://github.com/Sanquin/FINDEM>.<sup>31</sup>

210

## 211 *Deviations from protocol*

212 As the number of donors with low ferritin was higher than anticipated after implementation in the  
213 first group, further implementation was executed in smaller steps to mitigate the impact on the  
214 blood supply.<sup>17</sup> Additional ferritin measurements were done on samples from all donations one year  
215 after the third measurement round (between November 23<sup>rd</sup> and 27<sup>th</sup> 2020). This fourth time point  
216 enables evaluation of long-term results. We furthermore deviated from the protocol by using  
217 ordinary least squares regression instead of linear mixed models. In the linear mixed models for  
218 analysis of the primary outcomes with random effects for the donation center clusters, the ICC  
219 ranged from 0.00 to 0.05;  $R^2$  did not improve with random effects; and residual variance exceeded  
220 the variance between clusters. This indicates that the random effects of the donation center clusters  
221 were of minimal importance and justifies the use of linear regression models. We conducted  
222 sensitivity analyses for donor return, stratifying by ferritin level, reason for deferral, and donation  
223 center type. Lastly, we added a sixth element (impact on the blood supply) to the research question  
224 and accordingly adjusted the methods.

225

## 226 **Results**

227 A total of 412,888 whole blood donors made 1,634,700 donations during the study period. We  
228 performed measurements in samples of 37,621 donations by 36,099 donors (Figure 1). Table 1 shows  
229 the characteristics of donors by sex and randomization group in measurement week 1, in Table S1  
230 they are compared to measurements from week 4. Overall, across the randomization groups, donor  
231 characteristics were well balanced and comparable with the general donor population (Table 1).<sup>32</sup>  
232 Characteristics of the 7,573 participants in the questionnaire in measurement week 2 are provided in  
233 Table S2.

234

235 Figure 2 shows that the prevalence of iron deficiency and Hb deferral decreased after  
236 implementation of the policy. Ferritin-guided donation intervals are associated with significantly  
237 higher ferritin and Hb levels and less iron deficiency and Hb deferrals (Figure 3a). Compared to pre-

238 implementation, the intervention was associated with up to 0.24 ng/mL higher log<sub>10</sub> ferritin and 0.37  
239 g/dL higher Hb at 36 months after implementation in males (Figure 3a). In premenopausal and  
240 postmenopausal females, we also observe positive, but smaller, associations with an increasing trend  
241 over time. Moreover, the odds ratio of 0.19 indicates that males are 81% less likely to be iron  
242 deficient at 36 months after implementation than before the intervention (Figure 3a). In  
243 postmenopausal females, odds ratios also decrease over the course of the trial, with iron deficiency  
244 being 87% less likely at 36 months after implementation compared to pre-implementation (Figure  
245 3a). Hb deferral in males was up to 77% less likely as time since implementation increased, compared  
246 to pre-implementation. Similarly, in premenopausal females, Hb deferral is up to 44% less likely at  
247 30-35 months after implementation than at pre-implementation (Figure 3a). In postmenopausal  
248 females, Hb deferral is up to 51% less likely at 36 months after implementation than at pre-  
249 implementation.

250

251 After adjustment for return being during a COVID-19 lockdown, odds for donor return within six  
252 months are lower at each time point after implementation compared to pre-implementation (Figure  
253 3a). Generally, the negative association with donor return was stronger in males. At 36 months after  
254 implementation, males were 42% less likely to return for donation (Figure 3a). For premenopausal  
255 and postmenopausal females, we do not observe a consistent decrease in odds over time (Figure 3a).  
256 Tables S4-6 show that the differences in odds between groups of ferritin levels, reasons for deferral  
257 and donation center types are mostly not statistically significant.

258

259 There were no consistent significant patterns for pica, fatigue, cognitive functioning, the SF-36, and  
260 warm glow after implementation of the new policy (Figure 3b). However, males and premenopausal  
261 and postmenopausal females were 49%, 127%, and 127% more likely to report RLS at 24 months  
262 after implementation than before implementation.

263

264 Table 2 shows that during the implementation of the policy, the donation target and number of  
265 donations decreased, but the number of invitations needed to obtain one donation increased. The  
266 average donation frequency of donors decreased over the years and subsequently the number of  
267 donors that donated increased. The number of available donors increased and the proportion that  
268 donated fluctuated between 80 and 90% over the years. The number of simultaneously unavailable  
269 donors stabilized at around 40,000 donors per year. While the percentage of low ferritin deferrals  
270 increased as a result of the implemented policy, the percentage of low-Hb deferrals decreased. The  
271 number of new donors at the blood bank was higher in 2019 and 2020 than in other years, while the  
272 number of lapsed donors in 2019 was exceptionally low.

273

## 274 **Discussion**

275 This stepped-wedge cluster-randomized trial in whole blood donors shows that ferritin and Hb levels  
276 are significantly higher and iron deficiency and Hb deferral significantly lower after the  
277 implementation of ferritin-guided donation intervals compared to the prior standard of Hb  
278 monitoring only. Conversely, we found that the odds of donor return within six months decreased  
279 substantially with this policy. Most iron deficiency-related symptoms remained unaffected, except for  
280 an increase in reports of RLS. The continuity of the blood supply was maintained, but additional  
281 efforts were required to account for the decreased donor availability.

282

283 Ferritin-guided donation intervals were associated with significantly less iron deficiency and higher  
284 ferritin and Hb levels compared to pre-implementation, consistent with findings from donor  
285 population simulations assessing ferritin testing's impact.<sup>33</sup> The weaker effects observed in  
286 premenopausal females could be due to their already less frequent donations before the policy,  
287 driven by longer donation intervals and more frequent low-Hb deferrals, providing more recovery  
288 time.<sup>34,35</sup> Additionally, because of more stable iron stores due to the healthy donor effect, combined

289 with lower donation frequency and ferritin levels in this group, may result in less pronounced  
290 improvements compared to other groups.<sup>36,37</sup>

291

292 Our finding that the new policy is associated with significantly lower odds of donor return supports  
293 previous findings on decreased return rates after deferral, but may additionally be explained by the  
294 negative effects of the COVID-19 pandemic on blood donation intentions, as donors measured after  
295 full implementation were slated to return during COVID-19 lockdowns.<sup>35,38-40</sup> The weaker negative  
296 association with donor return in premenopausal compared to other groups may again be explained  
297 by their exposure to more frequent deferral through the old Hb monitoring policy.

298

299 The increased reporting of RLS seems surprising, but may simply be a result of increased awareness  
300 through information provided to donors upon implementation in their donation center. Further  
301 investigation shows no statistically significant correlation between RLS and ferritin levels. The lack of  
302 improvement we found in self-reported iron deficiency-related symptoms may partially be due to the  
303 small number of questionnaire participants before implementation. However, our findings align with  
304 previous randomized placebo-controlled trials investigating iron repletion and self-reported donor  
305 health.<sup>41-43</sup> Moreover, the benevolence and warm glow that drive donors may overshadow negative  
306 health consequences.<sup>23</sup> More functional and objective measures of iron deficiency-related symptoms  
307 like fatigue are thus needed. Positive effects of the steady reduction in iron deficiency and Hb  
308 deferral on self-reported iron deficiency-related symptoms may be delayed and require longer  
309 follow-up in future studies.

310

311 Given the results of this trial regarding donor health and the continued fulfillment of the donation  
312 target during and after the implementation of ferritin-guided donation intervals, Sanquin decided to  
313 keep the policy in place. Our findings do, however, raise some important policy and practical  
314 considerations. First, it provides policymakers with a monitoring option that requires no effort from

315 blood donors, may be more effective in protecting iron status than standard Hb monitoring practices,  
316 and does not impose a risk of side effects compared to iron supplementation.<sup>10</sup> However, the  
317 decreasing donor availability due to decreasing odds of donor return and increased numbers of  
318 deferred donors stress the need for intensified donor recruitment and retention efforts.<sup>34</sup> This is  
319 reflected in the blood bank practice, as more invitations are needed to obtain one donation.  
320 Moreover, as donation frequencies decreased after implementation of the policy, more donors were  
321 needed to reach donation demands. To increase donor availability, iron supplementation can be  
322 considered as an alternative or additional strategy.<sup>33,44</sup>

323

324 To our knowledge, this is the first randomized study that goes beyond the limitations of Hb  
325 monitoring by evaluating the effectiveness of ferritin-guided donation intervals in improving Hb and  
326 ferritin levels, donor return rates and decreasing iron deficiency, Hb deferrals, iron deficiency-related  
327 symptoms. One of the major strengths is the stepped-wedge cluster randomized approach as it  
328 allows simultaneous implementation and evaluation of a new policy. However, there are also  
329 limitations to this study. The nature of the intervention poses a risk of overestimating the positive  
330 effect of ferritin-guided donation intervals. Donors whose donation intervals are extended, may not  
331 return frequently, potentially resulting in selection bias. The risk of overestimation is to some extent  
332 minimized as the duration of the trial exceeds the length of extended donation intervals. There may  
333 even be underestimation of the effect on iron deficiency, as cut-offs for iron deficiency used in this  
334 study are lower than suggested in literature.<sup>45,46</sup> There may also be undetected delayed effects in this  
335 trial, because ferritin levels are measured at every fifth donation, and thus individual donors may not  
336 be confronted with the policy immediately upon implementation in their donation center.

337

338 The FIND'EM study provides substantial evidence that ferritin-guided donation intervals increase Hb  
339 and ferritin levels and thereby effectively prevent iron deficiency and Hb deferral, while efforts are  
340 needed to mitigate effects on the blood supply. Future studies may investigate long-term effects on

341 donor health outcomes. Our results may help blood services worldwide to improve their donor iron  
342 management policies in order to protect donors from developing iron deficiency.

343

#### 344 **Declarations**

345 *Ethics approval and consent to participate*

346 Sanquin's Ethical Advisory Board has reviewed and approved the FIND'EM protocol. Only data from  
347 donors who gave consent for their information and left-over material to be used for research  
348 purposes at the health check were included in the study. Donors who completed questionnaires  
349 provided informed consent for their questionnaire data to be matched with data from the donor  
350 database.

351

#### 352 **Competing interests**

353 The authors declare that they have no competing interests.

354

#### 355 **Funding**

356 The current project is supported by the 'Product and Process Development Cellular Products Grant'  
357 (PPOC18-15) granted to K. van den Hurk by the Research Programming Committee, Sanquin,  
358 Amsterdam, The Netherlands.

359

#### 360 **Authors' contributions**

361 KvdH designed the study. KvdH, MS, FP and FQ set up and coordinated data collection. AM, and SR  
362 wrote the analysis plan and drafted the manuscript. AM, SR and FP conducted the analyses with  
363 support from EH. The manuscript was critically reviewed and approved by all co-authors.



364

365 **Acknowledgements**

366 We would like to acknowledge all blood bank staff for their commitment to the implementation of  
367 the policy and their efforts in collecting data for our study. We are thankful to all donors for their  
368 contribution to the study and the blood supply.

## References

1. WHO. Blood safety and availability. <https://www.who.int/news-room/fact-sheets/detail/blood-safety-and-availability>
2. Prinsze FJ, de Groot R, Timmer TC, Zalpuri S, van den Hurk K. Donation-induced iron depletion is significantly associated with low hemoglobin at subsequent donations. *Transfusion*. 2021;61(12):3344-3352. doi:10.1111/trf.16688
3. Boulton F. Evidence-based criteria for the care and selection of blood donors, with some comments on the relationship to blood supply, and emphasis on the management of donation-induced iron depletion. *Transfus Med*. 2008;18(1):13-27. doi:10.1111/j.1365-3148.2007.00818.x
4. Newman B. Iron depletion by whole-blood donation harms menstruating females: the current whole-blood-collection paradigm needs to be changed. *Transfusion*. 2006;46(10):1667-1681. doi:10.1111/j.1537-2995.2006.00969.x
5. Brittenham GM. Iron balance in the red blood cell donor. *Dev Biol (Basel)*. 2005;120:77-82.
6. Vinkenoog M, van den Hurk K, van Kraaij M, van Leeuwen M, Janssen MP. First results of a ferritin-based blood donor deferral policy in the Netherlands. *Transfusion*. 60(8):1785-1792. doi:10.1111/trf.15906
7. Boulton F. Managing donors and iron deficiency. *Vox Sang*. 2004;87 Suppl 2:22-24. doi:10.1111/j.1741-6892.2004.00448.x
8. Schotten N, Pasker-de Jong PC, Moretti D, et al. The donation interval of 56 days requires extension to 180 days for whole blood donors to recover from changes in iron metabolism. *Blood*. 2016;128(17):2185-2188. doi:10.1182/blood-2016-04-709451
9. Alvarez-Ossorio, Kirchner, Klüter, Schlenke. Low ferritin levels indicate the need for iron supplementation: strategy to minimize iron-depletion in regular blood donors. *Transfusion Medicine*. 2000;10(2):107-112. doi:<https://doi.org/10.1046/j.1365-3148.2000.00239.x>
10. Smith GA, Fisher SA, Doree C, Di Angelantonio E, Roberts DJ. Oral or parenteral iron supplementation to reduce deferral, iron deficiency and/or anaemia in blood donors. *Cochrane Database Syst Rev*. 2014;(7):CD009532. doi:10.1002/14651858.CD009532.pub2
11. Baart AM, van den Hurk K, de Kort WL. Minimum donation intervals should be reconsidered to decrease low hemoglobin deferral in whole blood donors: an observational study. *Transfusion*. 2015;55(11):2641-2644. doi:10.1111/trf.13195
12. Di Angelantonio E, Thompson SG, Kaptoge S, et al. Efficiency and safety of varying the frequency of whole blood donation (INTERVAL): a randomised trial of 45 000 donors. *Lancet*. 2017;390(10110):2360-2371. doi:10.1016/S0140-6736(17)31928-1
13. Spencer B. Blood donor iron status: are we bleeding them dry? *Curr Opin Hematol*. 2013;20(6):533-539. doi:10.1097/MOH.0b013e32836589f2
14. Simon TL, Garry PJ, Hooper EM. Iron stores in blood donors. *Jama*. 1981;245(20):2038-2043.
15. Cable RG, Brambilla D, Glynn SA, et al. Effect of iron supplementation on iron stores and total body iron after whole blood donation. *Transfusion*. 2016;56(8):2005-2012. doi:10.1111/trf.13659

16. WHO. Guidelines on Assessing Donor Suitability for Blood Donation. In: *Blood Donor Selection*. ; 2012. <https://www.ncbi.nlm.nih.gov/pubmed/23700651>
17. Sweegers MG, Zalpuri S, Quee FA, et al. Ferritin measurement IN Donors—Effectiveness of iron Monitoring to diminish iron deficiency and low haemoglobin in whole blood donors (FIND’EM): study protocol for a stepped wedge cluster randomised trial. *Trials*. 2020;21(1):823. doi:10.1186/s13063-020-04648-w
18. European Committee (Partial Agreement) on Blood Transfusion (CD-P-TS). *Guide to the Preparation, Use and Quality Assurance of Blood Components*. European Directorate for the Quality of Medicines and HealthCare; 2017.
19. Moazzen S, Sweegers MG, Janssen M, Hogema BM, Hoekstra T, Van Den Hurk K. Ferritin Trajectories over Repeated Whole Blood Donations: Results from the FIND+ Study. *JCM*. 2022;11(13):3581. doi:10.3390/jcm11133581
20. Ware Jr. JE, Sherbourne CD. The MOS 36-item short-form health survey (SF-36). I. Conceptual framework and item selection. *Med Care*. 1992;30(6):473-483.
21. Vercoulen JHMM; SCMA; FJFM; GJMD; van der MJWM; BG. de Checklist Individual Strength (CIS). *Gedragstherapie*. 1999;32:131-136.
22. Van den Hurk K, Peffer K, Habets K, et al. Blood donors’ physical characteristics are associated with pre- and post-donation symptoms - Donor InSight. *Blood Transfus*. 2017;15(5):405-412. doi:10.2450/2016.0023-16
23. Ferguson E, Atsma F, de Kort W, Veldhuizen I. Exploring the pattern of blood donor beliefs in first-time, novice, and experienced donors: differentiating reluctant altruism, pure altruism, impure altruism, and warm glow. *Transfusion*. 2012;52(2):343-355. doi:10.1111/j.1537-2995.2011.03279.x
24. R Core Team. R: a language and environment for statistical computing. Published online 2020.
25. Bates D, Mächler M, Bolker B, Walker S. Fitting Linear Mixed-Effects Models Using **lme4**. *J Stat Soft*. 2015;67(1). doi:10.18637/jss.v067.i01
26. Fox J, Weisberg S. *An R Companion to Applied Regression*. Third edition. SAGE; 2019.
27. Zeileis A, Hothorn T. Diagnostic Checking in Regression Relationships. *R News*. 2002;2(3):7-10.
28. Zeileis A. Object-Oriented Computation of Sandwich Estimators. *Journal of Statistical Software*. 2006;16(9):1-16. doi:10.18637/jss.v016.i09
29. Hebbali A. *Olsrr: Tools for Building OLS Regression Models*.; 2020. <https://CRAN.R-project.org/package=olsrr>
30. Todorov V, Filzmoser P. An Object-Oriented Framework for Robust Multivariate Analysis. *Journal of Statistical Software*. 2009;32(3):1-47.
31. Allaire JJ, Teague C, Scheidegger C, Xie Y, Dervieux C. Quarto. Published online January 2022. doi:10.5281/zenodo.5960048

32. Timmer TC, de Groot R, Habets K, et al. Donor InSight: characteristics and representativeness of a Dutch cohort study on blood and plasma donors. *Vox Sang*. 2019;114(2):117-128. doi:10.1111/vox.12731
33. Richard P, Fillet A, Malard L, et al. Impact of donor ferritin testing on iron deficiency prevention and blood availability in France: A cohort simulation study. *Vox Sanguinis*. 2023;118(1):24-32. doi:10.1111/vox.13377
34. Spekman MLC, Ramondt S, Sweegers MG. Whole blood donor behavior and availability after deferral: Consequences of a new ferritin monitoring policy. *Transfusion*. 2021;61(4):1112-1121. doi:10.1111/trf.16235
35. Spekman MLC, Tilburg TG, Merz E. Do deferred donors continue their donations? A large-scale register study on whole blood donor return in the Netherlands. *Transfusion*. 2019;59(12):3657-3665. doi:10.1111/trf.15551
36. Moazzen S, sweegers M, Hogema B, Hoekstra T, van den Hurk K. Ferritin trajectories over repeated whole blood donations: results from the FIND+ study. *medRxiv*. Published online 2021:2021.12.13.21267744. doi:10.1101/2021.12.13.21267744
37. Atsma F, Veldhuizen I, Verbeek A, de Kort W, de Vegt F. Healthy donor effect: its magnitude in health research among blood donors. *Transfusion*. 2011;51(8):1820-1828. doi:10.1111/j.1537-2995.2010.03055.x
38. Custer B, Chinn A, Hirschler NV, Busch MP, Murphy EL. The consequences of temporary deferral on future whole blood donation. *Transfusion*. 2007;47(8):1514-1523. doi:10.1111/j.1537-2995.2007.01292.x
39. Custer B, Schlumpf KS, Wright D, et al. Donor return after temporary deferral. *Transfusion*. 2011;51(6):1188-1196. doi:10.1111/j.1537-2995.2010.02989.x
40. Veseli B, Sandner S, Studte S, Clement M. The impact of COVID-19 on blood donations. Dickert S, ed. *PLoS ONE*. 2022;17(3):e0265171. doi:10.1371/journal.pone.0265171
41. Hod EA, Brittenham GM, Bitan ZC, et al. A randomized trial of blood donor iron repletion on red cell quality for transfusion and donor cognition and well-being. *Blood*. 2022;140(25):2730-2739. doi:10.1182/blood.2022017288
42. Waldvogel S, Pedrazzini B, Vaucher P, et al. Clinical evaluation of iron treatment efficiency among non-anemic but iron-deficient female blood donors: a randomized controlled trial. *BMC Med*. 2012;10:8. doi:10.1186/1741-7015-10-8
43. Keller P, von Känel R, Hincapié CA, et al. The effects of intravenous iron supplementation on fatigue and general health in non-anemic blood donors with iron deficiency: a randomized placebo-controlled superiority trial. *Sci Rep*. 2020;10(1):14219. doi:10.1038/s41598-020-71048-0
44. Karregat J, Sweegers MG, Quee FA, et al. Ferritin-guided iron supplementation in whole blood donors: optimal dosage, donor response, return and efficacy (FORTE)-a randomised controlled trial protocol. *BMJ Open*. 2022;12(3):e056316-e056316. doi:10.1136/bmjopen-2021-056316
45. Galetti V, Stoffel NU, Sieber C, Zeder C, Moretti D, Zimmermann MB. Threshold ferritin and hepcidin concentrations indicating early iron deficiency in young women based on upregulation of iron absorption. *EClinicalMedicine*. 2021;39:101052. doi:10.1016/j.eclinm.2021.101052

46. Tarancon-Diez L, Genebat M, Roman-Enry M, et al. Threshold Ferritin Concentrations Reflecting Early Iron Deficiency Based on Hepcidin and Soluble Transferrin Receptor Serum Levels in Patients with Absolute Iron Deficiency. *Nutrients*. 2022;14(22):4739. doi:10.3390/nu14224739

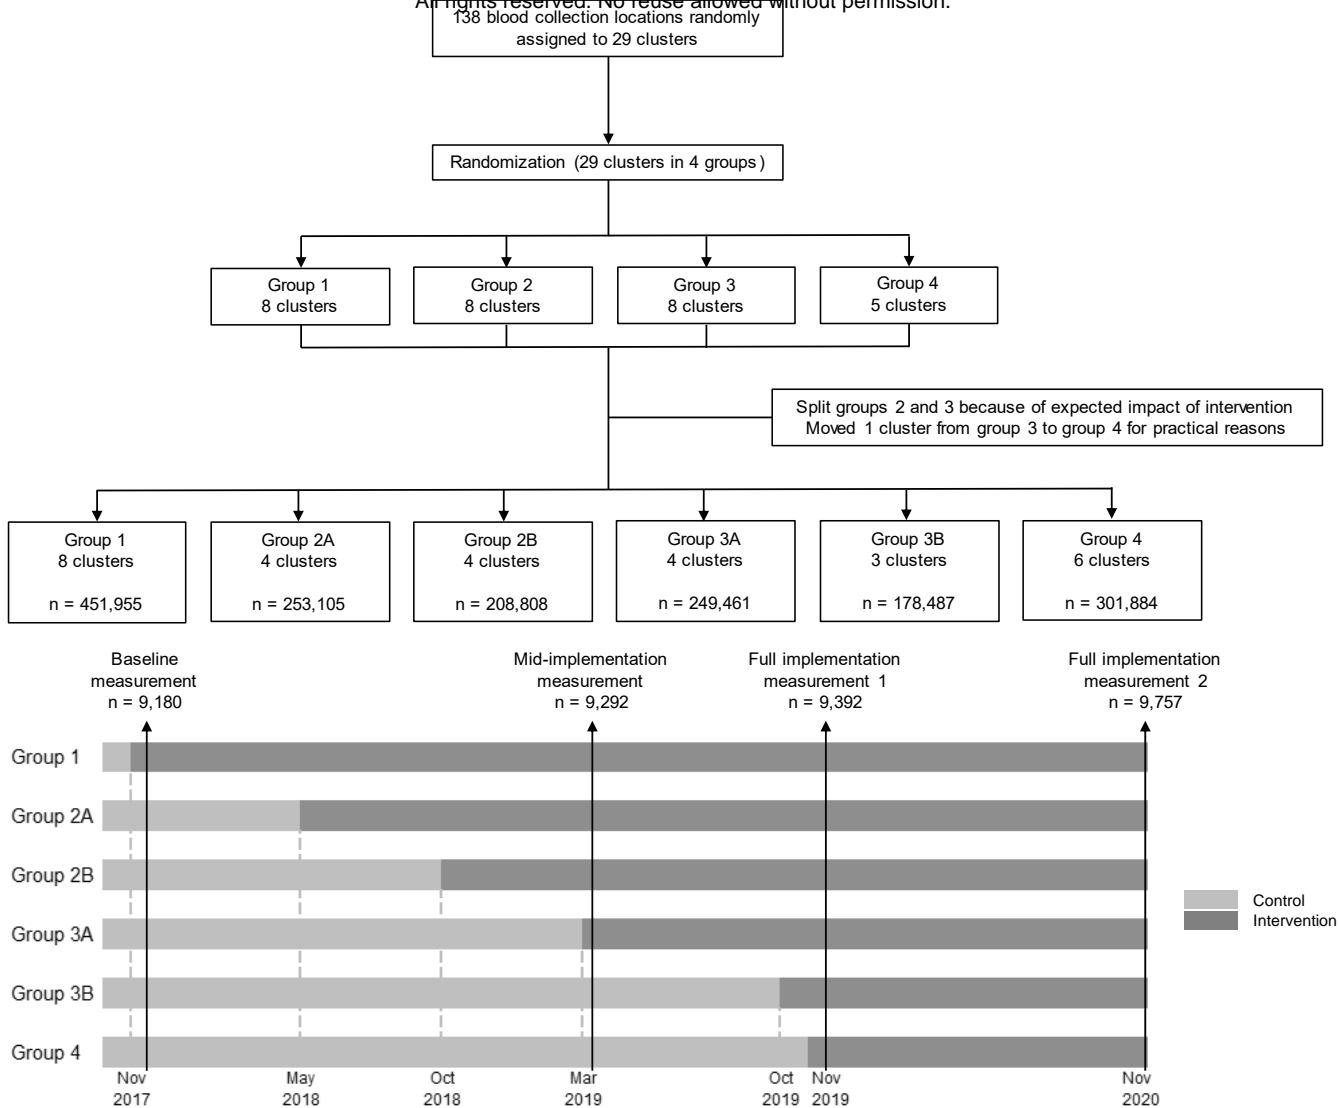

Figure 1. Stepped-wedge cluster randomized trial design and timing of intervention rollout (n displayed represents donations).

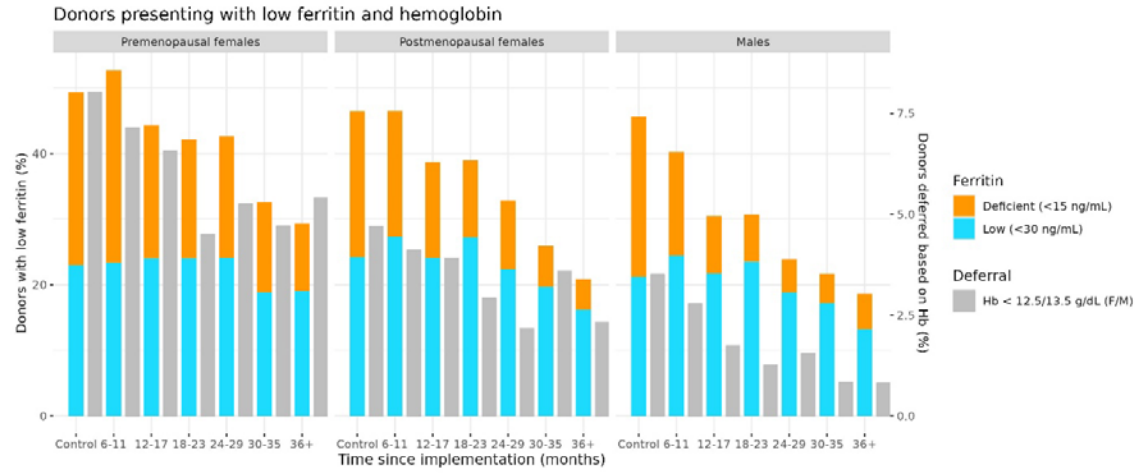

Figure 2. Percentage of low Hb and ferritin deferral per sex in controls and at six timepoints post-intervention.

**A** Associations of implementation of ferritin-guided donation intervals with primary study outcomes

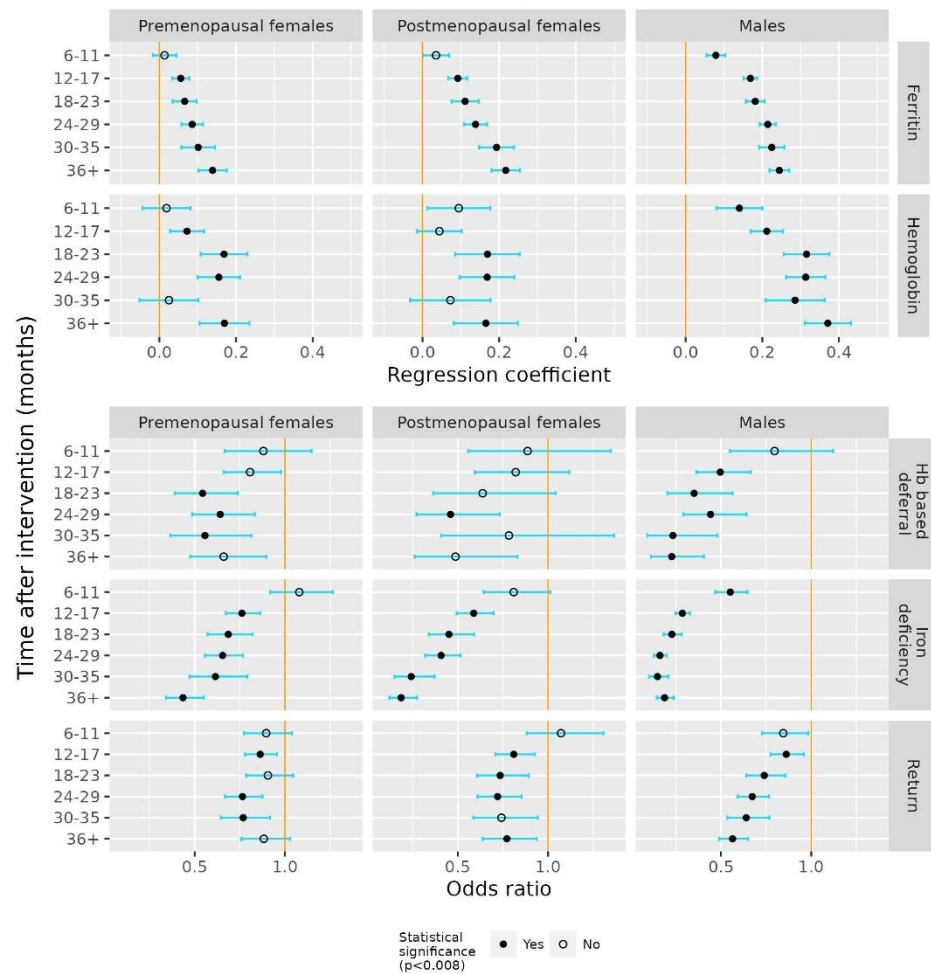

Ferritin: log<sub>10</sub> ng/mL; Hb: g/dL; Iron deficiency: ferritin < 15 ng/mL; Hb deferral: males < 13.5 g/dL, females < 12.5 g/dL; Return: within 6 months of first allowed date. Reference group: no implementation and 0-5 months since implementation. All analyses are adjusted for age, height and weight. Return is additionally adjusted for whether return would be during first COVID lockdown (March-May 2020). Statistical significance: Bonferroni correction applied to adjust for multiple testing (0.05/6).

**B** Associations of implementation of ferritin-guided donation intervals with secondary study outcomes

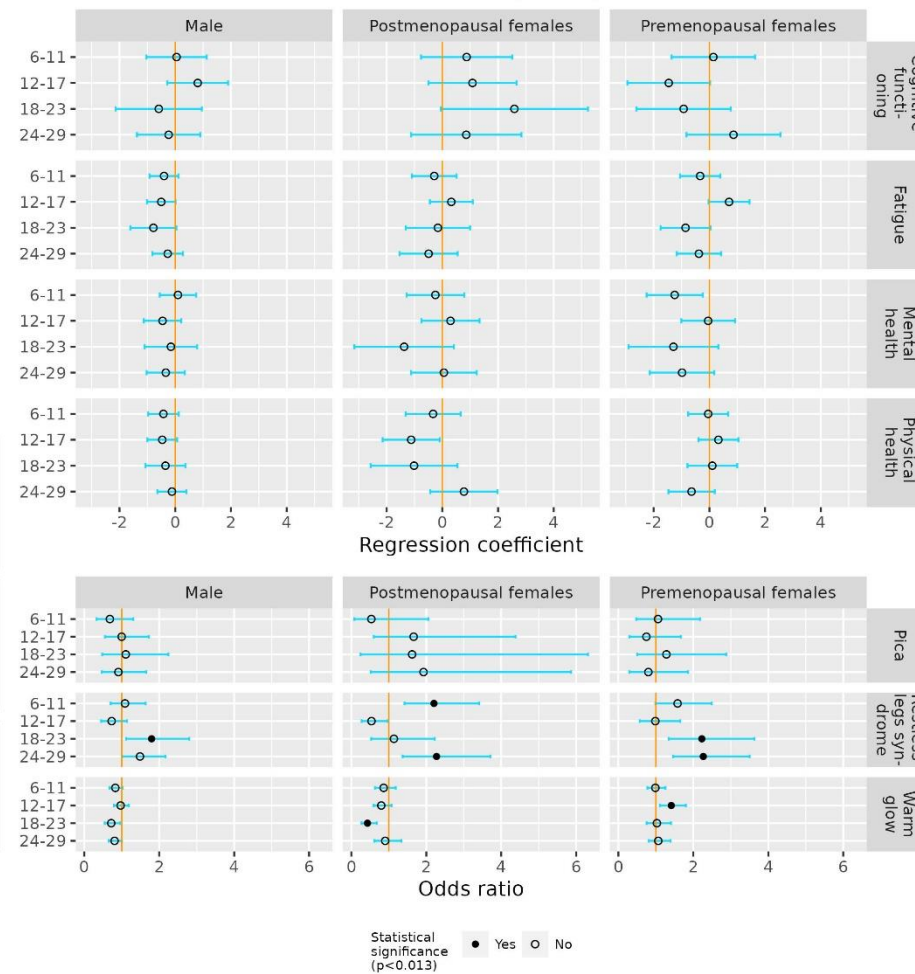

Statistical significance: Bonferroni correction applied to adjust for multiple testing (0.05/6). Cognitive functioning: higher score indicates worse result. Physical & mental health: higher score indicates better result.

Figure 3. Results of regression analyses for iron-related outcomes, donor return and iron-deficiency related symptoms. Corresponding coefficients, confidence intervals and p-values are displayed in Table S3.



**Table 1.** Donor characteristics in measurement week 1, where group 1 had just implemented the new policy and groups 2, 3, and 4 were considered controls.

|                                                                   | Group 1 <sup>1</sup> | Group 2            | Group 3            | Group 4            | Overall            |
|-------------------------------------------------------------------|----------------------|--------------------|--------------------|--------------------|--------------------|
| <b>Pre-menopausal, female donors</b>                              | <b>N = 688</b>       | <b>N = 590</b>     | <b>N = 634</b>     | <b>N = 465</b>     | <b>N = 2,377</b>   |
| New donors, N (%)                                                 | 167 (24.3)           | 109 (18.5)         | 131 (20.7)         | 86 (18.5)          | 493 (20.7)         |
| Age (years), median [IQR]                                         | 25.0 [21.0, 33.0]    | 26.0 [21.0-34.0]   | 26.0 [22.0-33.8]   | 25.0 [21.0-31.0]   | 25.0 [21.0-33.0]   |
| Height (cm), mean (SD)                                            | 171 (6.4)*           | 171 (6.9)          | 171 (6.3)*         | 171 (6.4)          | 171 (6.5)*         |
| Weight (kg), mean (SD)                                            | 71.0 (12.2)*         | 71.0 (12.4)        | 71.4 (11.9)        | 70.8 (12.1)        | 71.1 (12.2)*       |
| Hemoglobin, median [IQR], g/dL                                    | 13.4 [12.7-12.4]     | 13.4 [12.9-14.0]   | 13.5 [12.9-14.0]   | 13.4 [12.9-14.0]   | 13.4 [12.9-14.0]   |
| Low hemoglobin deferral (<12.5 g/dL), N (%)                       | 64 (9.3)             | 34 (5.8)           | 46 (7.3)           | 43 (9.2)           | 187 (7.9)          |
| Ferritin, median [IQR], ng/mL                                     | 26.2 [13.3-46.2]**   | 24.4 [12.1-46.7]** | 24.7 [12.7-45.5]** | 23.7 [10.3-40.3]** | 25.1 [12.3-45.4]** |
| Iron deficiency (ferritin < 15 ng/mL), N (%)                      | 161 (23.4)**         | 159 (26.9)**       | 173 (27.3)**       | 130 (28.0)**       | 623 (26.2)**       |
| Total number of whole blood donations, median [IQR]               | 2.0 [1.0-7.0]        | 3.0 [1.0-9.0]      | 4.0 [1.0-10.0]     | 3.0 [1.0-9.0]      | 3.0 [1.0-9.0]      |
| Number of whole blood donations in the past 2 years, median [IQR] | 2.0 [1.0-4.0]        | 2.0 [1.0-4.0]      | 2.0 [1.0-4.0]      | 3.0 [1.0-4.0]      | 2.0 [1.0-4.0]      |
| Donor return within 6 months of first allowed date, N (%)         | 478 (66.5)           | 383 (64.9)         | 436 (68.8)         | 323 (69.5)         | 1,620 (68.2)       |
| <b>Post-menopausal, female donors</b>                             | <b>N = 388</b>       | <b>N = 379</b>     | <b>N = 387</b>     | <b>N = 308</b>     | <b>N = 1,462</b>   |
| New donors, N (%)                                                 | 11 (2.8)             | 7 (1.8)            | 13 (3.4)           | 2 (0.6)            | 33 (2.3)           |
| Age (years), median [IQR]                                         | 55.0 [49.0-60.0]     | 55.0 [50.0-61.0]   | 56.0 [49.0-60.0]   | 55.0 [49.8-62.0]   | 55.0 [50.0-61.0]   |
| Height (cm), mean (SD)                                            | 170 (5.9)            | 169 (6.1)          | 170 (6.2)          | 170 (5.9)          | 170 (6.0)          |
| Weight (kg), mean (SD)                                            | 74.5 (11.3)          | 73.4 (12.3)        | 73.9 (12.4)        | 73.3 (11.6)        | 73.8 (11.9)        |
| Hemoglobin, median [IQR], g/dL                                    | 13.9 [13.1-14.5]     | 13.5 [13.1-14.5]   | 13.7 [13.1-14.3]   | 13.5 [13.1-14.3]   | 13.7 [13.1-14.3]   |
| Low hemoglobin deferral (<12.5 g/dL), N (%)                       | 19 (4.9)             | 19 (5.0)           | 21 (5.4)           | 11 (3.6)           | 70 (4.8)           |
| Ferritin, median [IQR], ng/mL                                     | 27.4 [13.5-44.0]***  | 28.3 [14.0-45.8]** | 25.7 [13.2-45.0]** | 26.7 [15.0-43.6]** | 27.4 [13.7-45.0]** |
| Iron deficiency (ferritin < 15 ng/mL), N (%)                      | 85 (21.9)***         | 87 (23.0)**        | 95 (24.5)**        | 64 (20.8)**        | 331 (22.6)**       |
| Total number of whole blood donations, median [IQR]               | 29.0 [11.0-50.0]     | 26.0 [12.0-42.0]   | 29.0 [12.0-46.0]   | 29.0 [12.0-47.0]   | 28.0 [12.0-46.0]   |
| Number of whole blood donations in the past 2 years, median [IQR] | 5.0 [3.0-5.0]        | 4.0 [3.0-5.0]      | 5.0 [3.0-6.0]      | 5.0 [3.0-5.0]      | 5.0 [3.0-6.0]      |
| Donor return within 6 months of first allowed date, N (%)         | 297 (76.5)           | 292 (77.0)         | 310 (80.1)         | 237 (76.9)         | 1,136 (77.7)       |
| <b>Male donors</b>                                                | <b>N = 1075</b>      | <b>N = 1061</b>    | <b>N = 1007</b>    | <b>N = 870</b>     | <b>N = 4,013</b>   |
| New donors, N (%)                                                 | 58 (5.4)             | 63 (5.9)           | 46 (4.6)           | 47 (5.4)           | 214 (5.3)          |
| Age (years), median [IQR]                                         | 48.0 [32.0-58.5]     | 51.0 [35.0-60.0]   | 49.0 [32.5-58.0]   | 49.0 [31.0-59.0]   | 49.0 [32.0-59.0]   |
| Height (cm), mean (SD)                                            | 184 (7.1)            | 183 (7.2)          | 183 (6.9)          | 183 (7.5)          | 183 (7.2)          |
| Weight (kg), mean (SD)                                            | 86.5 (12.1)          | 85.8 (12.2)        | 85.4 (12.0)        | 85.4 (11.9)*       | 85.8 (12.1)        |
| Hemoglobin, median [IQR], g/dL                                    | 14.8 [14.2-15.6]     | 14.8 [14.2-15.6]   | 14.8 [14.2-15.6]   | 14.8 [14.2-15.5]   | 14.8 [14.2-15.6]   |
| Low hemoglobin deferral (<13.5 g/dL), N (%)                       | 42 (3.9)             | 27 (2.5)           | 34 (3.4)           | 27 (3.1)           | 130 (3.2)          |
| Ferritin, median [IQR], ng/mL                                     | 25.3 [12.3-54.9]**   | 25.9 [13.2-55.3]** | 24.8 [12.4-50.0]** | 24.5 [11.6-54.8]** | 25.2 [12.4-53.2]** |
| Iron deficiency (ferritin < 15 ng/mL), N (%)                      | 280 (26.0)**         | 273 (25.7)**       | 272 (27.0)**       | 243 (27.9)**       | 1,068 (26.6)**     |
| Total number of whole blood donations, median [IQR]               | 30.0 [7.0-68.0]      | 39.0 [8.0-71.0]    | 32.0 [8.0-64.0]    | 31.5 [7.0-70.0]    | 32.0 [7.0-68.0]    |
| Number of whole blood donations in the past 2 years, median [IQR] | 6.0 [4.0-9.0]        | 6.0 [4.0-9.0]      | 6.0 [4.0-8.0]      | 6.0 [4.0-8.0]      | 6.0 [4.0-8.0]      |

| [IQR]                                                     |            |            |            |            |              |
|-----------------------------------------------------------|------------|------------|------------|------------|--------------|
| Donor return within 6 months of first allowed date, N (%) | 924 (86.0) | 905 (85.3) | 870 (86.4) | 738 (84.8) | 3,437 (85.6) |

<sup>1</sup>Randomly assigned clusters of donation centres (Group 1-3: 8 clusters, group 4: 5 clusters)

Missing: \* < 10%, \*\* 10-20%, \*\*\* > 20%

**Table 2.** Blood bank statistics to describe impact of new policy on blood supply in the Netherlands. Ferritin-guided donation intervals were implemented in a step-wise manner from November 2017 onwards. Hence, there is no data on prolonged intervals due to low ferritin in 2016. In November 2019 implementation was completed and in November 2020 the study was completed. All statistics

|                                        | 2016    | 2017    | 2018    | 2019    | 2020    | 2021    | 2022    |
|----------------------------------------|---------|---------|---------|---------|---------|---------|---------|
| Hospital demand (in donation units)    | 418,491 | 407,215 | 406,199 | 407,460 | 402,578 | 400,757 | 392,805 |
| Donations                              | 421,019 | 410,956 | 412,266 | 412,479 | 411,021 | 406,845 | 393,633 |
| Donors                                 | 234,821 | 234,224 | 237,985 | 248,911 | 278,863 | 262,956 | 260,033 |
| Average donation frequency             | 1.79    | 1.75    | 1.73    | 1.66    | 1.47    | 1.55    | 1.51    |
| Average invitations per donation       | 2.83    | 2.95    | 3.03    | 3.12    | 3.19    | 3.41    | 3.59    |
| Low ferritin                           |         |         |         |         |         |         |         |
| Number of donations                    | -       | 1,979   | 19,044  | 45,829  | 60,938  | 63,695  | 66,635  |
| Percentage of donations                | -       | 0.48    | 4.62    | 11.11   | 14.83   | 15.66   | 16.93   |
| Unique donors                          | -       | 1,973   | 17,441  | 38,961  | 53,841  | 51,140  | 45,696  |
| Hb deferral                            |         |         |         |         |         |         |         |
| Number of donations                    | 38,143  | 39,083  | 37,733  | 30,411  | 20,479  | 21,589  | 21,494  |
| Percentage of donations                | 9.06    | 9.51    | 9.15    | 7.37    | 4.98    | 5.31    | 5.46    |
| Unique donors                          | 32,008  | 32,844  | 31,539  | 26,222  | 20,599  | 16,813  | 17,820  |
| Available donors (Dec 31)              | 286,597 | 273,379 | 283,550 | 305,225 | 312,930 | 308,751 | 322,637 |
| Unavailable donors due to low ferritin | -       | 1,973   | 14,435  | 32,585  | 42,709  | 39,570  | 38,901  |
| Available donors invited to donate (%) | 81.93   | 85.68   | 83.93   | 81.55   | 80.11   | 85.17   | 80.60   |
| New donors                             | 50,107  | 44,362  | 58,419  | 60,121  | 71,983  | 54,194  | 53,194  |
| Lapsed donors                          | 49,066  | 51,579  | 42,782  | 26,571  | 47,918  | 55,341  | 29,982  |

are presented only for whole blood donations.
